# Supplementary material
Source: publisher figshare collection journal article supplement (https://karger.figshare.com/ndownloader/files/28970595)
Supplement: Supplementary file 1 [file 28970595]

| Supplementary table 3. Spearman's rank correlations between glycemic parameters, multimorbidity, and DM. | | | | | | | |
| --- | --- | --- | --- | --- | --- | --- | --- |
|  | Fasting  glucose | HbA1c | Insulin | HOMA-IR | CIRS-G-TS | CIRS-G-SI | DM |
| Fasting  glucose | 1 | **0.66***** | 0.34*** | **0.55***** | 0.29*** | 0.32*** | **0.68***** |
| HbA1c |  | 1 | **0.41***** | **0.54***** | 0.37*** | 0.37*** | **0.69***** |
| Insulin |  |  | 1 | **0.97***** | 0.25** | 0.15 | 0.26*** |
| HOMA-IR |  |  |  | 1 | 0.30*** | 0.22** | **0.42***** |
| CIRS-G-TS |  |  |  |  | 1 | **0.42***** | 0.38*** |
| CIRS-G-SI |  |  |  |  |  | 1 | 0.36*** |
| DM |  |  |  |  |  |  | 1 |
| * p<.05, ** p<.01, *** p<.001 | | | | | | | |
